# Supplementary material for: A three-dimensional interconnected V6O13 nest with a V5+-rich state for ultrahigh Zn ion storage
Source: Royal Society of Chemistry journal article supplement (doi:10.1039/d0ta03165h), 2020-01-01
Supplement: d0ta03165h1.pdf [file d0ta03165h1.pdf]

## ESI

### **Three-dimensional interconnected V<sub>6</sub>O<sub>13</sub> nest with V<sup>5+</sup>-rich state for ultrahigh Zn ion storage**

Pingge He<sup>a</sup>, Jiahao Liu<sup>a</sup>, Xudong Zhao<sup>a</sup>, Zhengping Ding<sup>b</sup>, Peng Gao<sup>b,c</sup>, Li-Zhen Fan<sup>a,\*</sup>

<sup>a</sup> Beijing Advanced Innovation Center for Materials Genome Engineering, Institute of Advanced Materials and Technology, University of Science and Technology Beijing, Beijing 100083, China

<sup>b</sup> International Center for Quantum Materials, Electron Microscopy Laboratory, School of Physics, Peking University, Beijing 100871, China.

<sup>c</sup> Collaborative Innovation Centre of Quantum Matter, Beijing 100871, China

#### **Experimental Details**

*The pre-treatment of carbon cloth:* Firstly, the carbon clothes are cleaned using acetone and distilled water under ultrasonic condition for 10 min. Then, the carbon clothes are immersed into a solution of 3M H<sub>3</sub>PO<sub>4</sub> (85%) under a temperature of 60°C for overnight. Finally, the treated carbon clothes are washed with distilled water and in vacuum overnight.

*The preparation of deposited-Zn on carbon cloth electrode:* The deposited-Zn on carbon cloth is prepared by a facile electrochemical deposition method using two-electrode setup. In detail, the Zn plate is used as counter electrode, pre-treated carbon cloth is used as working electrode and 1 M ZnSO<sub>4</sub> is used as electrolyte. Electroplating is conducted at 5 mA·cm<sup>-2</sup> for 1800 s using an electrochemical workstation (CHI 760D, Chenhua).

*The assembly of flexible Zn-ion battery:* First, the ZnSO<sub>4</sub>-PVA gel electrolyte was prepared by mixing 2.15 g ZnSO<sub>4</sub>·7H<sub>2</sub>O with deionized water (15 mL), and then adding 1.5 g PVA powder (molecular weight 89,000-98,000, 99% hydrolyzed, Sigma-Aldrich). The mixture was heated steadily from room temperature to approx. 85 °C under vigorous stirring until the solution became clear and thoroughly mixed. Then, a piece of V<sub>6</sub>O<sub>13</sub>/CC cathode and a piece of Zn/CC anode were immersed in the hot dilute polymer electrolyte solution. The dilute solution soaked and penetrated the porous electrodes well and formed a coating layer on the surface of the electrodes. The electrodes with the electrolyte solution coating on were placed in a fume hood at room temperature to evaporate the excess water. After the (0.5M) ZnSO<sub>4</sub>-PVA became solidified, the two electrodes were tightly pressed together into one integrated unit. The ZnSO<sub>4</sub>-PVA gel is used as both electrolyte and separator.

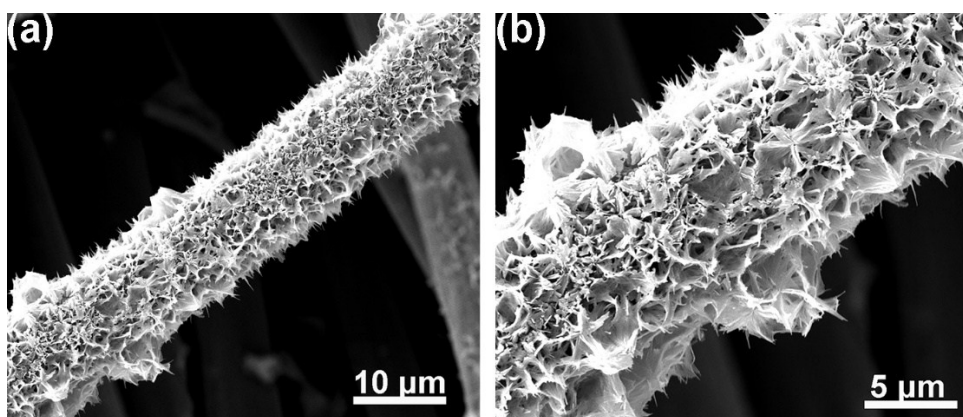

**Fig. S1.** SEM images of  $V_6O_{13}$  nest on CC before calcining: (a) at a low magnification; (b) at a high magnification.

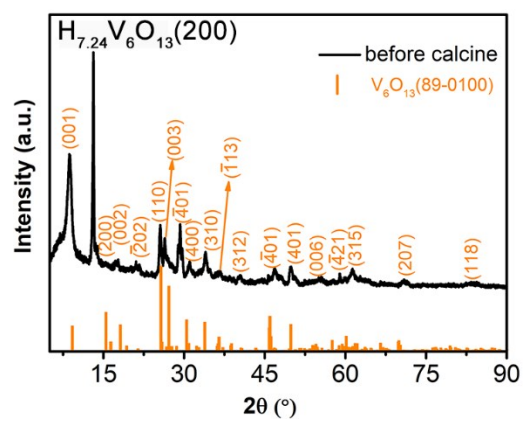

Fig. S2. XRD of  $V_6O_{13}$  powder before calcining

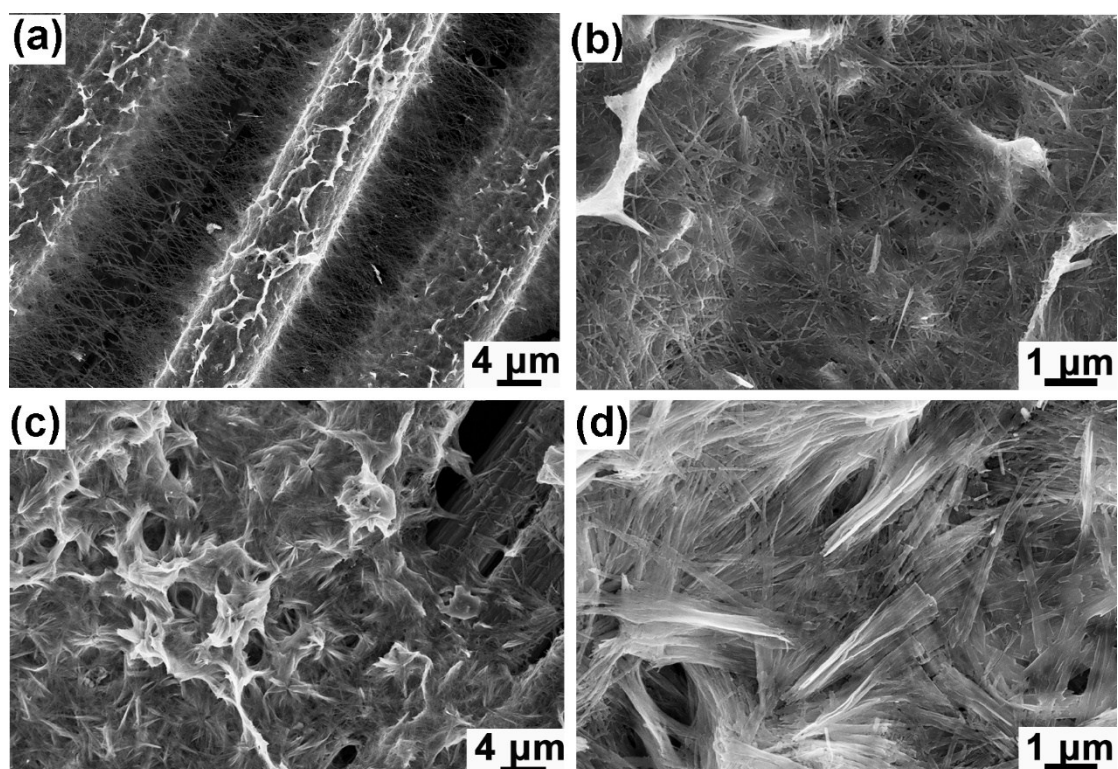

**Fig. S3.** SEM images of V<sub>6</sub>O<sub>13</sub> nests prepared under different hydrothermal durations: 2 h (a) at a low magnification and (b) at a high magnification. 10 h (c) at a low magnification and (d) at a high magnification.

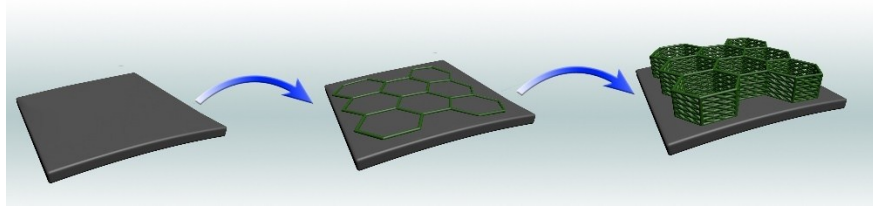

**Fig. S4.** Schematic of the formation process of 3D V<sub>6</sub>O<sub>13</sub> nest-like structure on CC surface.

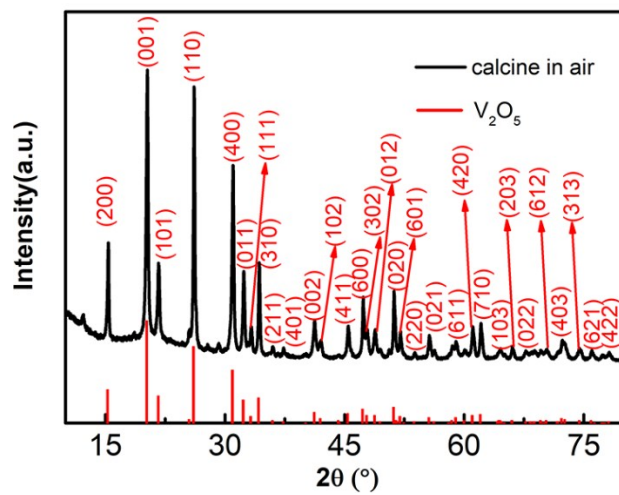

**Fig. S5.** XRD of products calcined in the air.

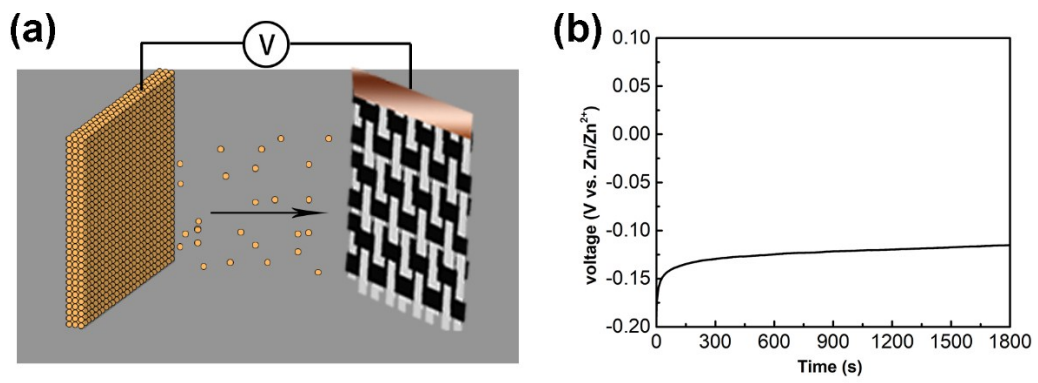

**Fig. S6.** Electrodeposition of Zn on CC: (a) Schematic illustration. (b) Current variation as a function of time.



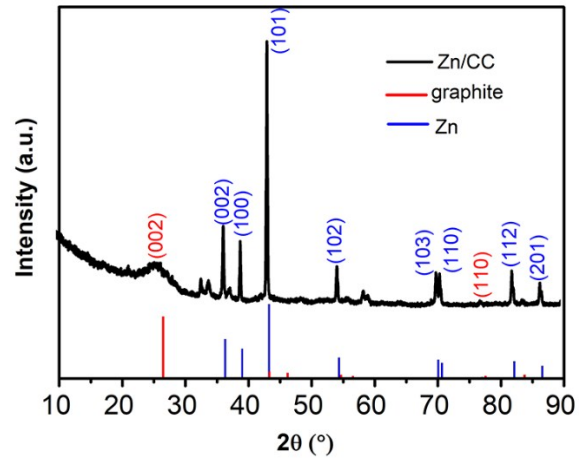

**Fig. S7.** XRD of Zn electrodeposited on CC.

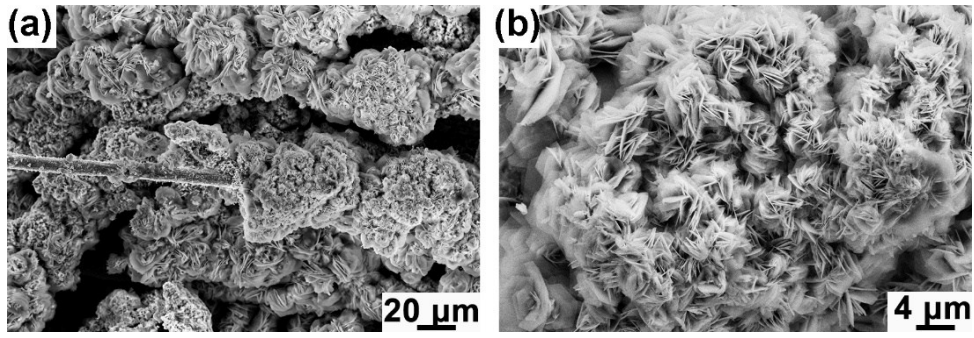

**Fig. S8.** SEM images of Zn electrodeposited on CC for 60 min: (a) at a low magnification. (b) at a high magnification.

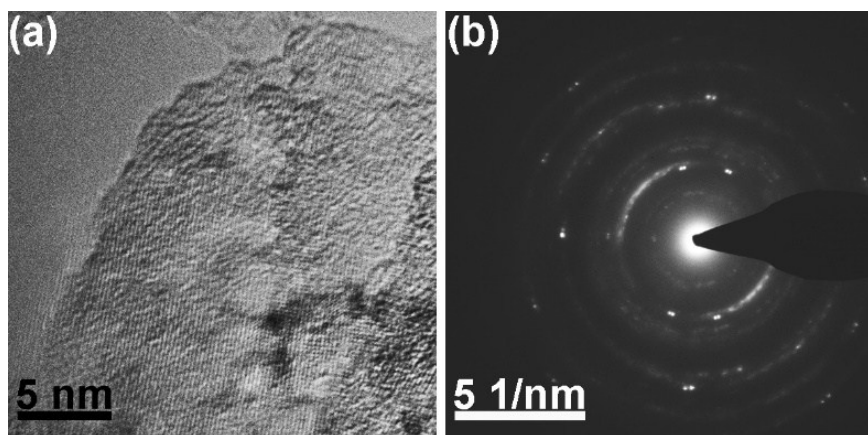

**Fig. S9.** (a) HRTEM of  $V_6O_{13}$  nanoneedles. (b) Corresponding selected area electron diffraction.

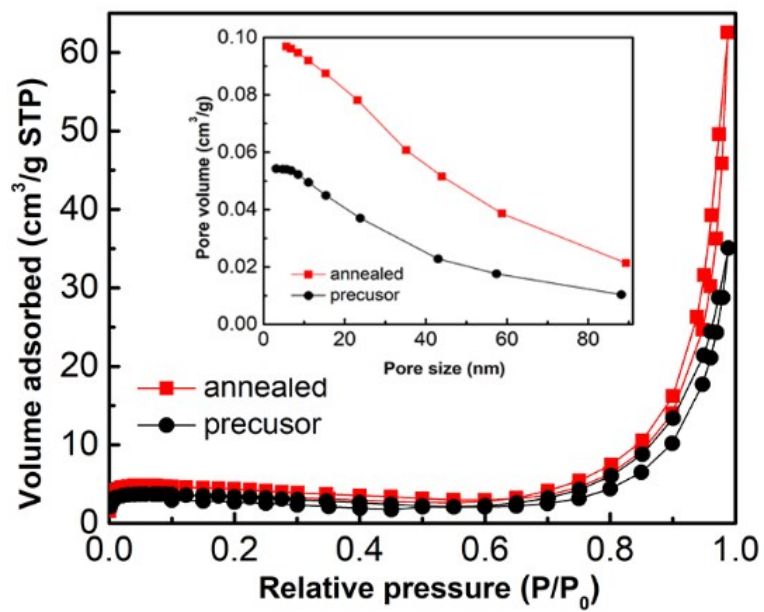

**Fig. S10.**  $N_2$  adsorption and desorption curves of  $V_6O_{13}$  before and after calcining, and the inset shows the BJH pore size distribution curve.

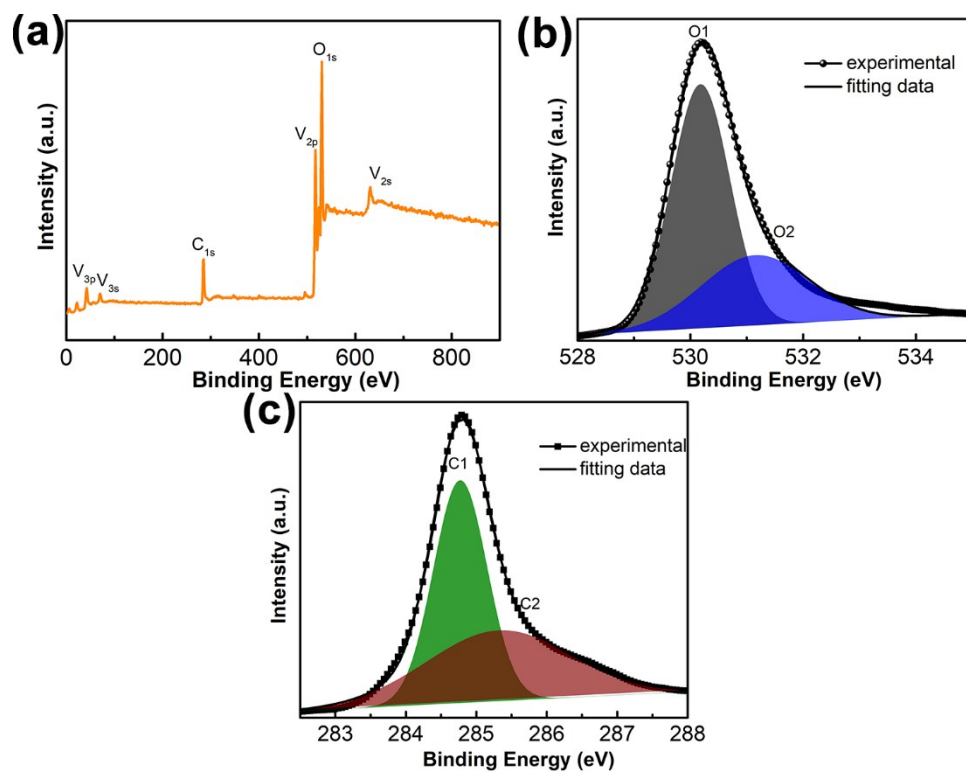

**Fig. S11.** XPS results of  $V_6O_{13}/CC$ : (a) full-scan spectrum; (b) O 1s; (c) C 1s.

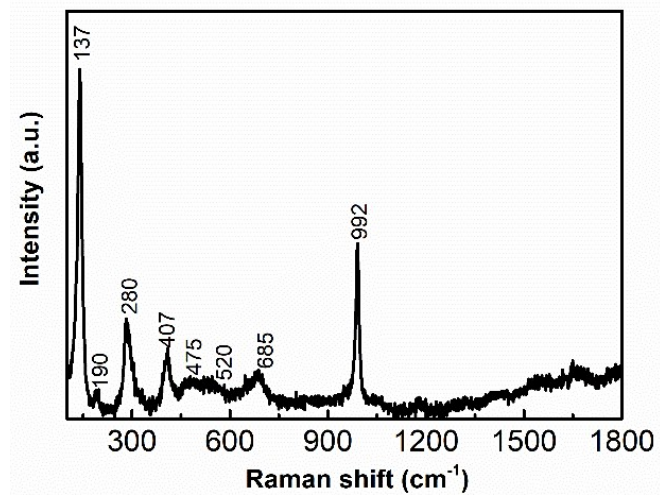

**Fig. S12.** Raman spectrum of bare V<sub>6</sub>O<sub>13</sub> powder.

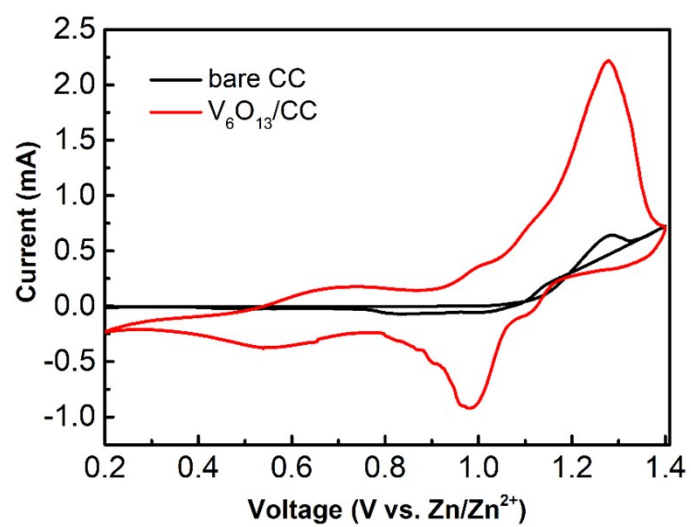

**Fig. S13.** Comparative CV curves of bare CC and V<sub>6</sub>O<sub>13</sub>/CC electrodes in 3M ZnSO<sub>4</sub> at a scan rate of 0.6 mV s<sup>-1</sup>.

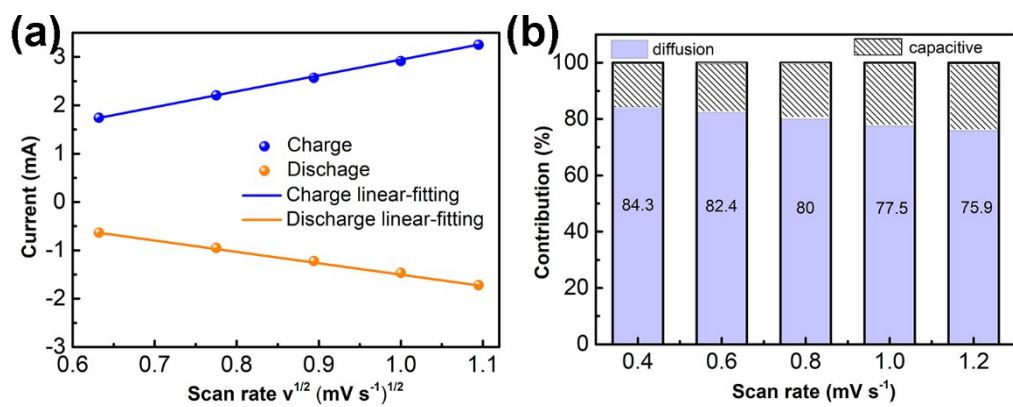

**Fig. S14.** The calculated diffusion contribution for  $\text{V}_6\text{O}_{13}/\text{CC}$  cathodes at different scan rates.



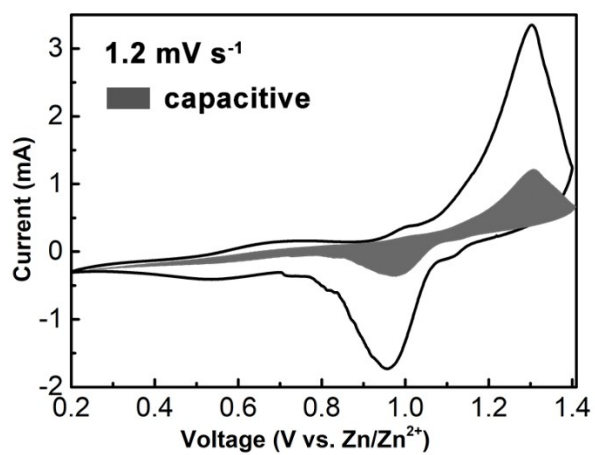

**Fig. S15.** Fitted CV curves suggesting the calculated capacitive contribution for V<sup>5+</sup>-rich V<sub>6</sub>O<sub>13</sub>/CC cathodes at a scan rate of 1.2 mV s<sup>-1</sup>.

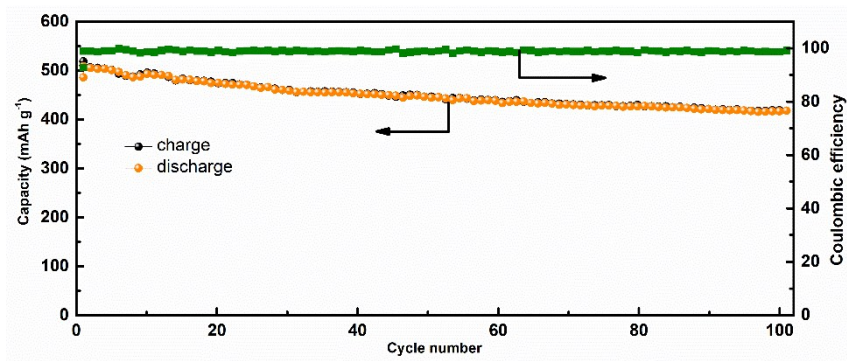

**Fig. S16.** Cyclic stability of V<sup>5+</sup>-rich V<sub>6</sub>O<sub>13</sub>/CC electrodes at 500 mA g<sup>-1</sup> over 100 cycles.

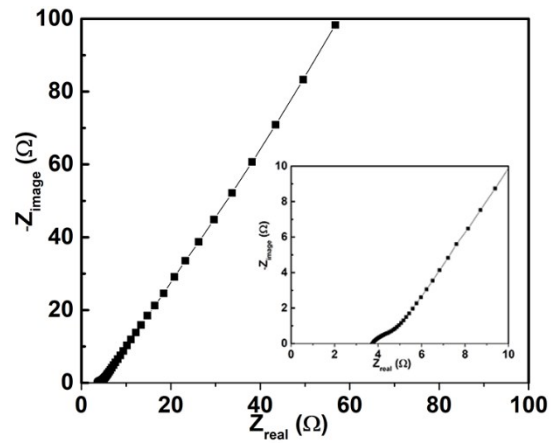

**Fig. S17.** Nyquist plots of well-balanced  $V_6O_{13}$  cathode (the inset shows the magnified EIS image at the high-frequency region).

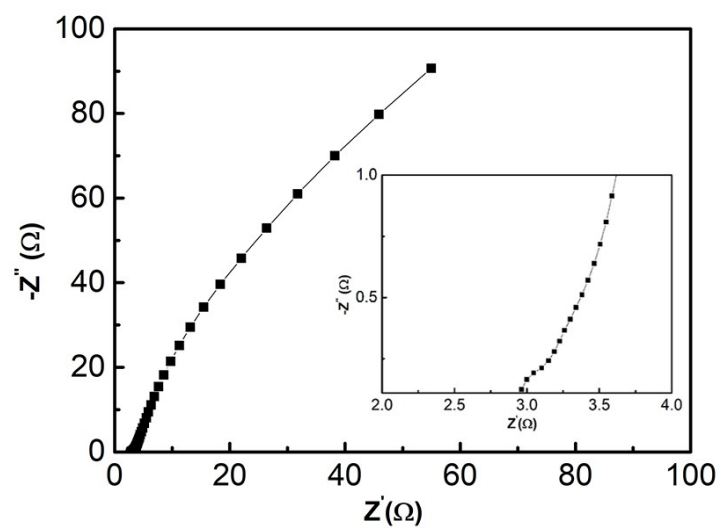

**Fig. S18.** Nyquist plots (the inset shows the magnified EIS image at the high-frequency region).

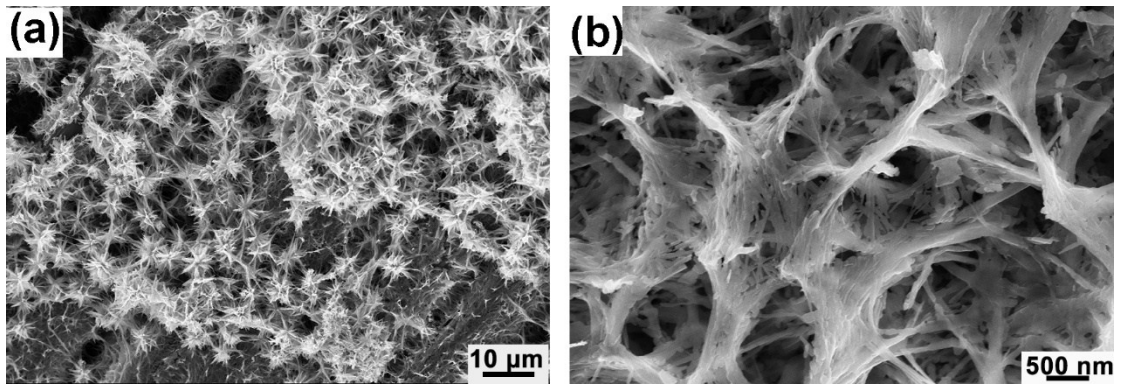

**Fig. S19.** SEM images of  $V^{5+}$ -rich  $V_6O_{13}/CC$  cathodes after 1000-cycling test: (a) at a low magnification; (b) at a high magnification.

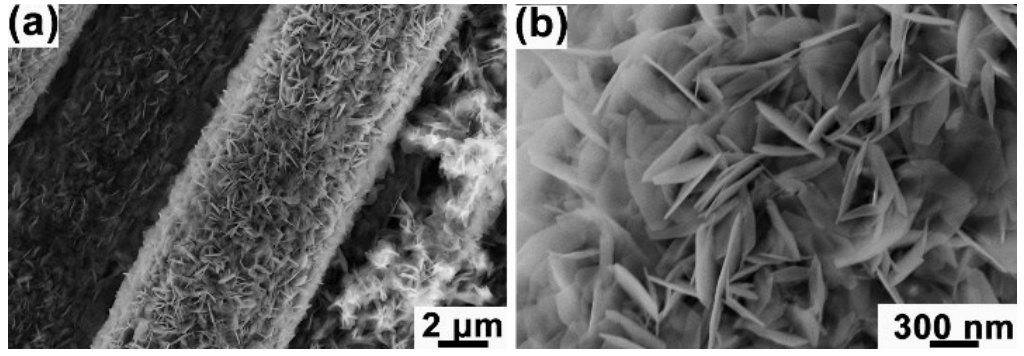

**Fig. S20.** SEM images of Zn/CC anode after cycling test: (a) at a low magnification; (b) at a high magnification.

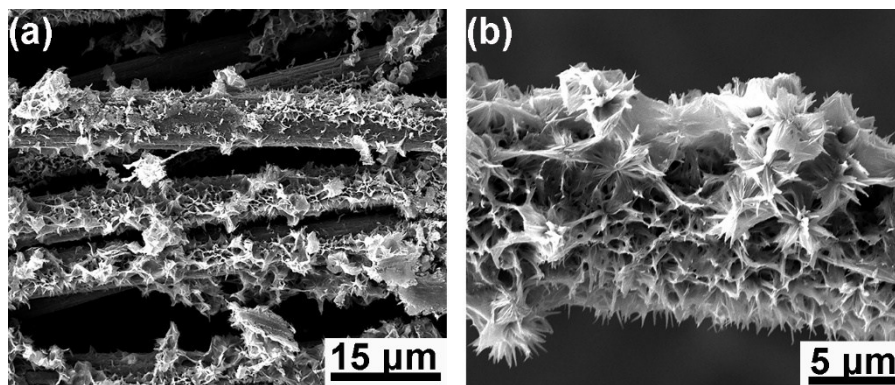

**Fig. S21.** SEM images of  $V^{5+}$ -rich  $V_6O_{13}/CC$  cathodes after discharging to 0.2V: (a) at a low magnification; (b) at a high magnification.

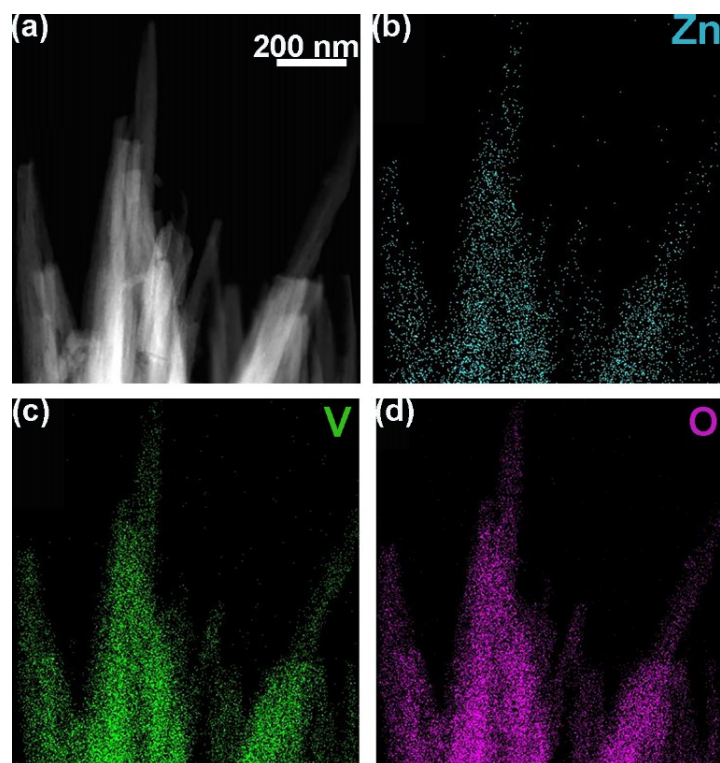

**Fig. S22.** STEM characterization of  $V_6O_{13}$  cathodes after discharging to 0.2V: (a) HADDF image. Elemental mappings of (b) Zn. (c) V. (d) O.



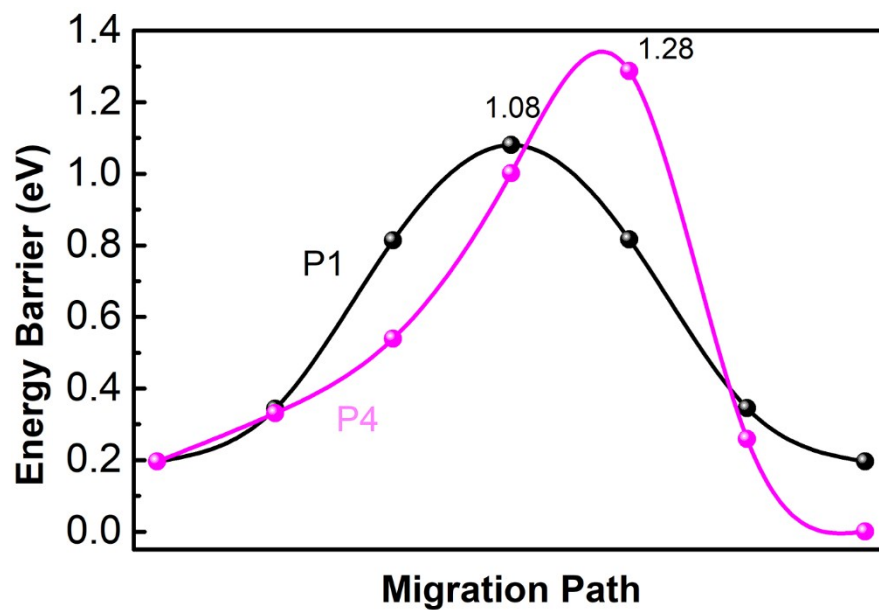

Fig. S23. Calculated diffusion energy barriers for paths P1 and P4.

**Table S1. A summary of the electrochemical performance of state-of-the-art V-based cathodes for ZIBs**

| Materials                                                                                                           | Current collector       | Electrolyte                                               | Discharge capacity (mAh g <sup>-1</sup> ) | Rate capability (mAh g <sup>-1</sup> ) | Cyclic stability         | Energy density /Power density                      |
|---------------------------------------------------------------------------------------------------------------------|-------------------------|-----------------------------------------------------------|-------------------------------------------|----------------------------------------|--------------------------|----------------------------------------------------|
| H <sub>2</sub> V <sub>3</sub> O <sub>8</sub> nanowires/graphene <sup>[1]</sup>                                      | Ti foil                 | 3M Zn(CF <sub>3</sub> SO <sub>3</sub> ) <sub>2</sub>      | 394 (0.1 A/g)                             | 270 (6 A/g)                            | 87%<br>2000 cycles       | 168 Wh kg <sup>-1</sup> at 34 W kg <sup>-1</sup>   |
| Utralong Zn <sub>3</sub> V <sub>2</sub> O <sub>7</sub> (OH) <sub>2</sub> ·2H <sub>2</sub> O nanowire <sup>[2]</sup> | Stainless steel         | 1M ZnSO <sub>4</sub>                                      | 213 (0.05 A/g)                            | 54 (3 A/g)                             | 68%<br>300 cycles        | 214 Wh kg <sup>-1</sup>                            |
| VO <sub>2</sub> (B) nanofibers <sup>[3]</sup>                                                                       | Ti foil                 | 3M Zn(CF <sub>3</sub> SO <sub>3</sub> ) <sub>2</sub>      | 357 (0.1 A/g)                             | 171 (51.2 A/g)                         | 50 cycles                | 297 Wh kg <sup>-1</sup> at 180 W kg <sup>-1</sup>  |
| V <sub>2</sub> O <sub>5</sub> ·nH <sub>2</sub> O/graphene <sup>[4]</sup> (plate-like structure)                     | Ti foil                 | 3M Zn(CF <sub>3</sub> SO <sub>3</sub> ) <sub>2</sub>      | 381 (0.06 A/g)                            | 248 (30 A/g)                           | 71%<br>900 cycles        | 144 Wh kg <sup>-1</sup>                            |
| Porous V <sub>2</sub> O <sub>5</sub> <sup>[5]</sup>                                                                 | Ti foil                 | Zn(CF <sub>3</sub> SO <sub>3</sub> ) <sub>2</sub> -LiTFSI | 238 (0.05 A/g)                            | 156 (1 A/g)                            | 80%<br>2000 cycles       | /                                                  |
| RGO/VO <sub>2</sub> composite films <sup>[6]</sup> (porous network)                                                 | Stainless steel         | 3M Zn(CF <sub>3</sub> SO <sub>3</sub> ) <sub>2</sub>      | 276 (0.1 A/g)                             | 120 (35 A/g)                           | 99%<br>1000 cycles       | 65 Wh kg <sup>-1</sup> at 7.8 kW kg <sup>-1</sup>  |
| VO <sub>2</sub> nanorods <sup>[7]</sup>                                                                             | -                       | 1M ZnSO <sub>4</sub>                                      | 325.6 (0.05 A/g)                          | 72 (5 A/g)                             | 86%<br>5000 cycles       | /                                                  |
| V <sub>6</sub> O <sub>13</sub> powder <sup>[8]</sup> (agglomeration of platelets)                                   | Pyrolytic graphite film | 3M Zn(CF <sub>3</sub> SO <sub>3</sub> ) <sub>2</sub>      | 360 (0.2 A/g)                             | 145 (24 A/g)                           | 92%<br>2000 cycles       | /                                                  |
| V <sub>6</sub> O <sub>13</sub> ·nH <sub>2</sub> O nanosheets <sup>[9]</sup>                                         | -                       | 3M Zn(CF <sub>3</sub> SO <sub>3</sub> ) <sub>2</sub>      | 395 (0.1 A/g)                             | 97 (20 A/g)                            | 87%<br>1000 cycles       | /                                                  |
| Cu <sub>3</sub> (OH) <sub>2</sub> V <sub>2</sub> O <sub>7</sub> ·2H <sub>2</sub> O nanosheets <sup>[10]</sup>       | Stainless steel         | 3M ZnSO <sub>4</sub>                                      | 336 (1 A/g)                               | -                                      | 1000 cycles<br>160 mAh/g | /                                                  |
| V <sub>5</sub> O <sub>12</sub> ·6H <sub>2</sub> O nanobelt <sup>[11]</sup>                                          | Stainless steel         | 3M Zn(CF <sub>3</sub> SO <sub>3</sub> ) <sub>2</sub>      | 354.8 (0.5 A/g)                           | 228 (5 A/g)                            | 94%<br>1000 cycles       | 194 Wh kg <sup>-1</sup> at 2.1 kW kg <sup>-1</sup> |
| H <sub>2</sub> V <sub>3</sub> O <sub>8</sub> nanowires <sup>[12]</sup>                                              | Ti foil                 | 3M Zn(CF <sub>3</sub> SO <sub>3</sub> ) <sub>2</sub>      | 423.8 (0.1 A/g)                           | 113.9 (5 A/g)                          | 94%<br>1000 cycles       | 250 Wh kg <sup>-1</sup>                            |
| V <sub>3</sub> O <sub>7</sub> ·H <sub>2</sub> O <sup>[13]</sup>                                                     | -                       | 1M ZnSO <sub>4</sub>                                      | 375 (0.375 A/g)                           | 270 (3 A/g)                            | 80%<br>200 cycles        | /                                                  |
| Zn <sub>2</sub> V <sub>2</sub> O <sub>7</sub> nanowire <sup>[14]</sup>                                              | Stainless steel         | 1M ZnSO <sub>4</sub>                                      | 248 (0.05 A/g)                            | 170 (4.4 A/g)                          | 85%<br>1000 cycles       | 90 Wh kg <sup>-1</sup> at 6.4 kW kg <sup>-1</sup>  |
| Na <sub>0.33</sub> V <sub>2</sub> O <sub>5</sub> nanowire <sup>[15]</sup>                                           | Ti foil                 | 3M Zn(CF <sub>3</sub> SO <sub>3</sub> ) <sub>2</sub>      | 373 (0.2A/g)                              | 96.4 (2 A/g)                           | 93%<br>(1000 cycles)     | /                                                  |
| Ca <sub>0.25</sub> V <sub>2</sub> O <sub>5</sub> ·nH <sub>2</sub> O nanobelt <sup>[16]</sup>                        | -                       | 1M ZnSO <sub>4</sub>                                      | 340 (0.2C)                                | 72 (80 C)                              | 86%<br>3000 cycles       | 267 Wh kg <sup>-1</sup> at 53.4 W kg <sup>-1</sup> |
| Bulk V <sub>2</sub> O <sub>5</sub> <sup>[17]</sup>                                                                  | Ti foil                 | 3M Zn(CF <sub>3</sub> SO <sub>3</sub> ) <sub>2</sub>      | 470 (0.2A/g)                              | 386 (10 A/g)                           | 91.1%<br>4000 cycles     | 274 Wh kg <sup>-1</sup> at 7.1 kW kg <sup>-1</sup> |

|                                                                                                                           |                                     |                                                         |                   |                   |                          |                                                      |
|---------------------------------------------------------------------------------------------------------------------------|-------------------------------------|---------------------------------------------------------|-------------------|-------------------|--------------------------|------------------------------------------------------|
| V <sub>2</sub> O <sub>5</sub> nanosheet <sup>[18]</sup>                                                                   | -                                   | 3M ZnSO <sub>4</sub>                                    | 372<br>(0.3A/g)   | -                 | 113mAh/g<br>(400 cycles) | 90 Wh kg <sup>-1</sup> at<br>6.4 kW kg <sup>-1</sup> |
| V <sub>10</sub> O <sub>24</sub> nanobelt <sup>[19]</sup>                                                                  | graphite<br>paper                   | 3M<br>Zn(CF <sub>3</sub> SO <sub>3</sub> ) <sub>2</sub> | 415<br>(0.2A/g)   | 166<br>(5 A/g)    | 65%<br>3000 cycles       | /                                                    |
| Al-doped V <sub>10</sub> O <sub>24</sub><br>nanobelt <sup>[19]</sup>                                                      | graphite<br>paper                   | 3M<br>Zn(CF <sub>3</sub> SO <sub>3</sub> ) <sub>2</sub> | 431<br>(0.2A/g)   | 232<br>(5 A/g)    | 98%<br>3000 cycles       | /                                                    |
| VO <sub>2</sub> nanorod <sup>[20]</sup>                                                                                   | carbon fibre<br>paper               | 1M ZnSO <sub>4</sub>                                    | 353<br>(1A/g)     | 272<br>(3 A/g)    | 75.5%<br>945 cycles      | /                                                    |
| V <sub>2</sub> O <sub>5</sub> nanopaper (V <sub>2</sub> O <sub>5</sub><br>nanofiber /carbon<br>nanotubes) <sup>[21]</sup> | -                                   | 2M ZnSO <sub>4</sub>                                    | 375<br>(0.5A/g)   | 219<br>(10 A/g)   | 77%<br>500 cycles        | /                                                    |
| V <sub>2</sub> O <sub>5</sub> hollow spheres <sup>[22]</sup>                                                              | Ti foil                             | 3M ZnSO <sub>4</sub>                                    | 280<br>(0.2A/g)   | 108<br>(10 A/g)   | 82.5%<br>6200 cycles     | /                                                    |
| V <sup>4+</sup> -V <sub>2</sub> O <sub>5</sub> Hollow<br>nanosphere <sup>[23]</sup>                                       | Stainless<br>steel                  | 2M ZnSO <sub>4</sub>                                    | 262.1<br>(1A/g)   | 124.9<br>(15 A/g) | 140 mAh/g<br>1000 cycles | /                                                    |
| This work                                                                                                                 | Carbon cloth<br>(free-<br>standing) | 3M ZnSO <sub>4</sub>                                    | 520<br>(0.5 A/g), | 234<br>(15 A/g)   | 335 mAh/g<br>1000 cycles | 234 Wh kg <sup>-1</sup> at<br>205 W kg <sup>-1</sup> |

## References

- 1 Q. Pang, C. Sun, Y. Yu, K. Zhao, Z. Zhang, P. M. Voyles, G. Chen, Y. Wei and X. Wang, *Adv. Energy Mater.*, 2018, **8**, 1800144.
- 2 C. Xia, J. Guo, Y. Lei, H. Liang, C. Zhao and H. N. Alshareef, *Adv. Mater.*, 2018, **30**, 1705580.
- 3 J. Ding, Z. Du, L. Gu, B. Li, L. Wang, S. Wang, Y. Gong and S. Yang, *Adv. Mater.*, 2018, **30**, 1800762.
- 4 M. Yan, P. He, Y. Chen, S. Wang, Q. Wei, K. Zhao, X. Xu, Q. An, Y. Shuang and Y. Shao, *Adv. Mater.*, 2017, **30**.
- 5 P. Hu, M. Yan, T. Zhu, X. Wang, X. Wei, J. Li, L. Zhou, Z. Li, L. Chen and L. Mai, *Acs Appl. Mater. Interfaces*, 2017, **9**, 42717.
- 6 D. Xi, W. Fang, Z. Linlin, C. Hongmei and N. Zhiqiang, *Energy Storage Mater.* 2019, **17**, 143.
- 7 L. Chen, Y. Ruan, G. Zhang, Q. Wei, Y. Jiang, T. Xiong, P. He, W. Yang, M. Yan and Q. An, *Chem. Mater.*, 2019, **31**, 699-706.
- 8 J. Shin, D. S. Choi, H. J. Lee, Y. Jung and J. W. Choi, *Adv. Energy Mater.*, 2019, **9**, 1900083.
- 9 J. Lai, H. Zhu, X. Zhu, H. Koritala and Y. Wang, *ACS Appl. Energy Mater.*, 2019, **2**, 1988-1996.
- 10 L. Shan, J. Zhou, M. Han, G. Fang, X. Cao, X. Wu and S. Liang, *J. Mater. Chem. A*, 2019, **7**, 7355-7359.

- 11 N. Zhang, M. Jia, Y. Dong, Y. Wang, J. Xu, Y. Liu, L. Jiao and F. Cheng, *Adv. Funct. Mater.*, 2019, **29**, 1807331.
- 12 P. He, Y. Quan, X. Xu, M. Yan, W. Yang, Q. An, L. He and L. Mai, *Small*, 2017, **13**, 1702551.
- 13 D. Kundu, S. H. Vajargah, L. Wan, B. Adams, D. Prendergast and L. F. Nazar, *Energy Environ. Sci.*, 2018, **11**, 881-892.
- 14 B. Sambandam, V. Soundharrajan, S. Kim, M. H. Alfaruqi, J. Jo, S. Kim, V. Mathew, Y.-k. Sun and J. Kim, *J. Mater. Chem. A*, 2018, **6**, 3850-3856.
- 15 P. He, G. Zhang, X. Liao, M. Yan, X. Xu, Q. An, J. Liu and L. Mai, *Adv. Energy Mater.*, 2018, **8**, 1702463.
- 16 C. Xia, J. Guo, P. Li, X. Zhang and H. N. Alshareef, *Angew. Chem. Int. Ed.*, 2018, **57**, 3943-3948.
- 17 N. Zhang, Y. Dong, M. Jia, X. Bian, Y. Wang, M. Qiu, J. Xu, Y. Liu, L. Jiao and F. Cheng, *ACS Energy Lett.*, 2018, **3**, 1366-1372.
- 18 Z. Jiang, L. Shan, Z. Wu, G. Xun and S. Liang, *Chem. Commun.*, 2018, **54**, 4457-4460.
- 19 Q. Li, T. Wei, K. Ma, G. Yang and C. Wang, *ACS Appl. Mater. Interfaces*, 2019, **11**, 20888-20894.
- 20 Z. Li, S. Ganapathy, Y. Xu, Z. Zhou, M. Sarilar and M. Wagemaker, *Adv. Energy Mater.*, 2019, **9**, 1900237.
- 21 Y. Li, Z. Huang, P. K. Kalambate, Y. Zhong, Z. Huang, M. Xie, Y. Shen and Y. Huang, *Nano Energy*, 2019, **60**, 752-759.
- 22 H. Qin, L. Chen, L. Wang, X. Chen and Z. Yang, *Electrochimica Acta*, 2019, **306**, 307-316.
- 23 F. Liu, Z. Chen, G. Fang, Z. Wang, Y. Cai, B. Tang, J. Zhou and S. Liang, *Nano-Micro Lett.*, 2019, **11**, 25.
